# Supplementary material for: Unlocking the Potential of Melting Calorimetry: A Field Protocol for Liquid Water Content Measurement in Snow
Source: Copernicus journal article supplement (doi:10.5194/egusphere-2024-1708), 2024-06-24
Supplement: Supplementary file [file egusphere-2024-1708-AC3-supplement.pdf]

## Errata corrigé - Answer to the Referee #2 – Manuscript tc-2024-1708

We just realized that we wrongly copied one of the formulae inside our response. To avoid other possible error and misunderstanding, here a screenshot of how Table I reads in our new version of the manuscript

$$M_{W_{\theta_w}} \quad \left| \quad \begin{array}{l} \text{Mass of the liquid water inside the sample, it can be expressed as: } M_{W_{\theta_w}} = \\ \theta_w M_s \frac{\rho_w}{\rho_s} \end{array} \right.$$

We apologize for any inconvenience this may have caused.
